# Supplementary material for: A simple nanoporous silica-based dual mode optical sensor for detection of multiple analytes (Fe3+, Al3+ and CN−) in water mimicking XOR logic gate
Source: Royal Society of Chemistry journal article supplement (doi:10.1039/c5ra23136a), 2016-01-01
Supplement: c5ra23136a1.pdf [file c5ra23136a1.pdf]

Supplementary Information

**A simple nanoporous silica-based dual mode optical sensor for detection of multiple analytes ( $\text{Fe}^{3+}$ ,  $\text{Al}^{3+}$  and  $\text{CN}^-$ ) in water mimicking XOR logic gate**

Jafar Afshani<sup>a</sup>, Alireza Badiee<sup>a,b,\*</sup>, Negar Lashgari<sup>a</sup>, Ghodsi Mohammadi Ziarani<sup>c</sup>

<sup>a</sup> School of Chemistry, College of Science, University of Tehran, Tehran, Iran

<sup>b</sup> Nanobiomedicine Center of Excellence, Nanoscience and Nanotechnology Research Center, University of Tehran, Tehran, Iran

<sup>c</sup> Department of Chemistry, Alzahra University, Tehran, Iran

**Fig. S1** Thermogravimetric analysis of a) SNH, and b) SSA.

**Fig. S2** FT-IR spectra of a) SBA-15, b) SNH, and c) SSA.

**Fig. S3** Fluorescence emission of SSA (3 mL  $\text{H}_2\text{O}$  suspension,  $0.2 \text{ g L}^{-1}$ ) upon addition of 100  $\mu\text{L}$  of various metal-ions ( $1 \times 10^{-2} \text{ M}$ ) including  $\text{Al}^{3+}$ ,  $\text{Fe}^{3+}$ ,  $\text{Mn}^{2+}$ ,  $\text{Mg}^{2+}$ ,  $\text{Pb}^{2+}$ ,  $\text{Hg}^{2+}$ ,  $\text{Cr}^{3+}$ ,  $\text{Na}^+$ ,  $\text{K}^+$ ,  $\text{Cd}^{2+}$ ,  $\text{Ca}^{2+}$ ,  $\text{Fe}^{2+}$ ,  $\text{Ni}^{2+}$ ,  $\text{Zn}^{2+}$ ,  $\text{Co}^{2+}$ , and  $\text{Cu}^{2+}$ .

**Fig. S4** FT-IR spectra of SSA (a) and SSA +  $\text{Al}^{3+}$  complex (b).

**Fig. S5** Fluorescence emission of SSA (3 mL  $\text{H}_2\text{O}$  suspension,  $0.2 \text{ g L}^{-1}$ ) upon addition of 100  $\mu\text{L}$  of various anions ( $1 \times 10^{-2} \text{ M}$ ) including  $\text{CN}^-$ ,  $\text{F}^-$ ,  $\text{Cl}^-$ ,  $\text{Br}^-$ ,  $\text{I}^-$ ,  $\text{SO}_4^{2-}$ ,  $\text{S}_2\text{O}_3^{2-}$ ,  $\text{SCN}^-$ ,  $\text{NO}_2^-$ ,  $\text{NO}_3^-$ , and  $\text{CH}_3\text{CO}_2^-$ .

---

\* Corresponding author at: School of Chemistry, College of Science, University of Tehran, Tehran, Iran  
Tel: +98 2161112614; fax: +98 2161112614  
E-mail address: [abadiei@khayam.ut.ac.ir](mailto:abadiei@khayam.ut.ac.ir) (A. Badiei)

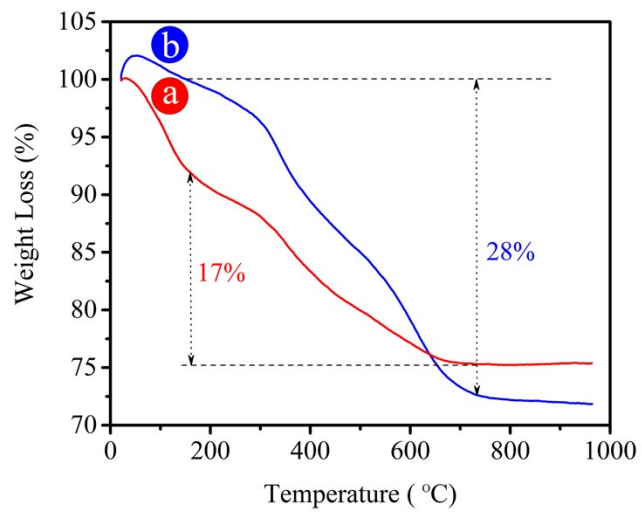

**Fig. S1**

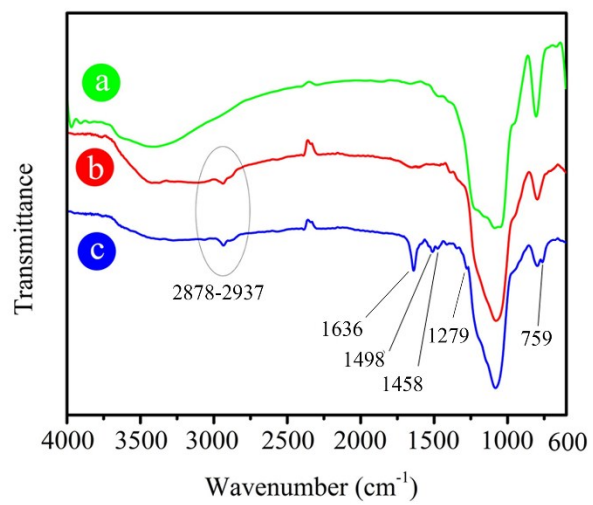

**Fig. S2**

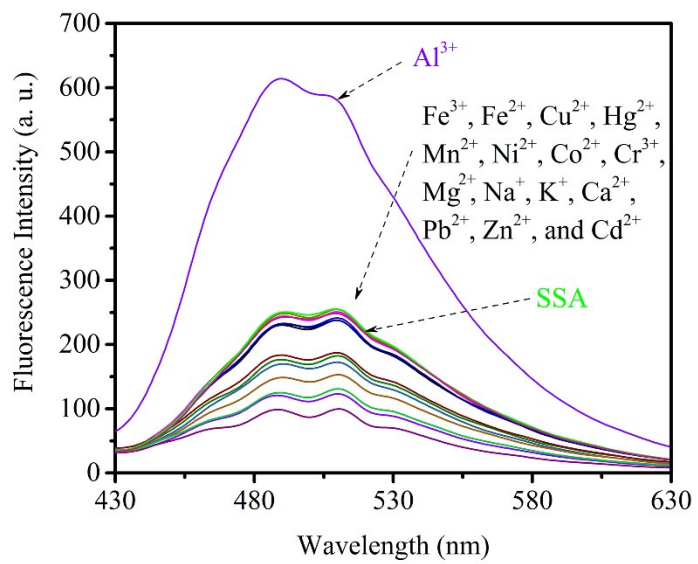

**Fig. S3**

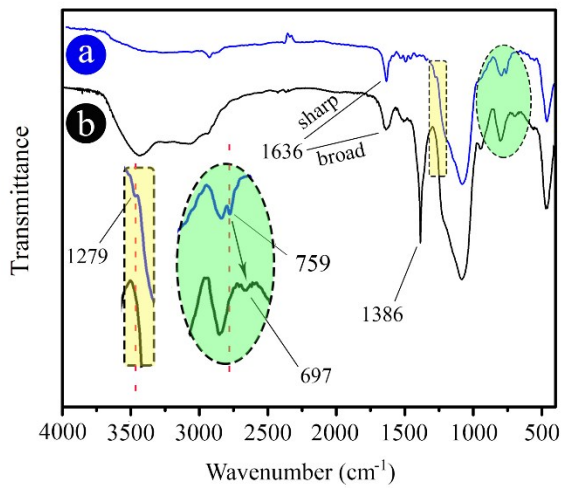

**Fig. S4**

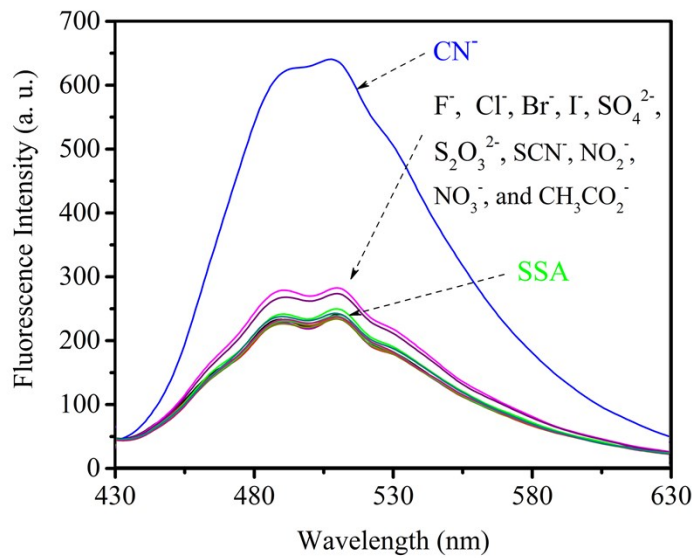

**Fig. S5**
